# Supplementary material
Source: Elsevier journal article supplement (https://comptes-rendus.academie-sciences.fr/biologies/article/10.1016/j.crvi.2009.01.003/file/attach/mmc1.pdf)
Supplement: mmc1 [file mmc1.pdf]

Appendix 1. Wasp species gathered during a baseline survey conducted along forest edges (424 wasp nests recorded belonging to 61 species and subspecies). *Clusia grandi* = *Clusia grandiflora*; *Vismia guian.* = *Vismia guianensis*; *Vismia sessi.* = *Vismia sessilifolia*; *Bellutia grandi.* = *Bellutia grandiflora*; *Astroc* = *Astrocaryum sciophyllum*; *Mahur* = *Mahurea palustris*; *Cecro* = *Cecropia obtusa*; *Tococ* = *Tococa guianensis*; *Helic.* = *Heliconia* sp.; *Goupi* = *Goupia glabra*; Others = Shelters other than plants (i.e., overhanging rocks and dirt). \* installed in the hollow trunk of a palm tree. Numbers in superscript correspond to cases of associations with ants.

| Genus species subspecies author             | <i>Clusia grandi</i> | <i>Vismia guian.</i> | <i>Vismia sessi.</i> | <i>Vismia latifolia</i> | <i>Bellutia grandi.</i> | <i>Astroc</i> | <i>Mahur</i> | <i>Cecro</i> | <i>Tococ</i>   | <i>Helic.</i> | <i>Goupi</i> | Other plants   | Others | Total           |
|---------------------------------------------|----------------------|----------------------|----------------------|-------------------------|-------------------------|---------------|--------------|--------------|----------------|---------------|--------------|----------------|--------|-----------------|
| <b>Polistini</b>                            |                      |                      |                      |                         |                         |               |              |              |                |               |              |                |        |                 |
| <i>Polistes c. canadensis</i> (Linnaeus)    | 0                    | 0                    | 0                    | 0                       | 0                       | 0             | 0            | 0            | 0              | 0             | 0            | 0              | 31     | 31              |
| <i>Polistes geminatus</i> Fox               | 0                    | 0                    | 0                    | 0                       | 0                       | 0             | 0            | 0            | 0              | 0             | 0            | 0              | 4      | 4               |
| <i>Polistes occipitalis</i> Ducke           | 0                    | 0                    | 0                    | 0                       | 0                       | 0             | 0            | 0            | 0              | 0             | 0            | 1              | 0      | 1               |
| <i>Polistes pacificus</i> Fabricius         | 8                    | 0                    | 6 <sup>2</sup>       | 0                       | 0                       | 0             | 1            | 0            | 1 <sup>1</sup> | 0             | 2            | 1 <sup>1</sup> | 0      | 19 <sup>4</sup> |
| <i>Polistes testaceicolor</i> Bequaert      | 0                    | 0                    | 0                    | 0                       | 0                       | 1             | 0            | 0            | 1 <sup>1</sup> | 0             | 1            | 0              | 0      | 3 <sup>1</sup>  |
| <i>Polistes v. versicolor</i> (Olivier)     | 0                    | 0                    | 0                    | 0                       | 0                       | 0             | 0            | 0            | 0              | 0             | 0            | 0              | 9      | 9               |
| <b>Mischocyttarini</b>                      |                      |                      |                      |                         |                         |               |              |              |                |               |              |                |        |                 |
| <i>Mischocyttarus collarellus</i> Richards  | 0                    | 0                    | 0                    | 0                       | 0                       | 1             | 0            | 0            | 0              | 0             | 0            | 2              | 0      | 3               |
| <i>M. injucundus</i> (de Saussure)          | 9                    | 0                    | 0                    | 1                       | 0                       | 0             | 1            | 0            | 0              | 0             | 0            | 0              | 0      | 11              |
| <i>Mischocyttarus lecointei</i> (Ducke)     | 0                    | 0                    | 0                    | 0                       | 0                       | 0             | 0            | 0            | 3 <sup>3</sup> | 1             | 0            | 1 <sup>1</sup> | 0      | 5 <sup>4</sup>  |
| <i>Mischocyttarus lemoulti</i> (du Buysson) | 0                    | 0                    | 0                    | 0                       | 0                       | 1             | 0            | 0            | 0              | 0             | 0            | 0              | 0      | 1               |
| <i>Mischocyttarus prominulus</i> Richards   | 0                    | 0                    | 0                    | 0                       | 0                       | 2             | 0            | 0            | 0              | 0             | 0            | 0              | 0      | 2               |
| <i>Mischocyttarus punctatus</i> (Ducke)     | 0                    | 0                    | 0                    | 0                       | 0                       | 0             | 0            | 0            | 0              | 0             | 0            | 0              | 2      | 2               |
| <i>M. surinamensis</i> (de Saussure)        | 3                    | 0                    | 0                    | 0                       | 0                       | 0             | 0            | 0            | 0              | 0             | 0            | 0              | 0      | 3               |
| <b>Epiponini</b>                            |                      |                      |                      |                         |                         |               |              |              |                |               |              |                |        |                 |
| <i>Agelaia angulata</i> (Fabricius)         | 0                    | 0                    | 0                    | 0                       | 0                       | 0             | 0            | 0            | 0              | 0             | 0            | 1              | 0      | 1               |
| <i>Agelaia cajennensis</i> (Fabricius)      | 0                    | 0                    | 0                    | 0                       | 0                       | 0             | 0            | 0            | 0              | 0             | 0            | 1              | 0      | 1               |
| <i>Agelaia constructor</i> (de Saussure)    | 0                    | 0                    | 0                    | 0                       | 0                       | 0             | 0            | 0            | 0              | 0             | 0            | 1              | 0      | 1               |



|                                                |     |    |                  |    |   |    |    |   |   |   |    |                |    |                  |
|------------------------------------------------|-----|----|------------------|----|---|----|----|---|---|---|----|----------------|----|------------------|
| <i>Protopolybia duckei</i> (du Buysson)        | 0   | 0  | 4 <sup>2</sup>   | 0  | 0 | 0  | 0  | 0 | 0 | 0 | 0  | 0              | 0  | 4 <sup>2</sup>   |
| <i>Protopolybia emortualis</i> (de Saussure)   | 0   | 0  | 16 <sup>16</sup> | 0  | 0 | 0  | 0  | 0 | 0 | 0 | 0  | 2 <sup>2</sup> | 0  | 18 <sup>18</sup> |
| <i>Protopolybia exigua binominata</i> Schulz   | 0   | 0  | 0                | 0  | 0 | 0  | 0  | 0 | 0 | 0 | 0  | 1              | 0  | 1                |
| <i>Protopolybia minutissima</i> (Spinola)      | 0   | 0  | 0                | 0  | 0 | 0  | 0  | 0 | 0 | 0 | 0  | 2              | 0  | 2                |
| <i>Protopolybia nitida</i> Ducke               | 2   | 0  | 0                | 0  | 0 | 0  | 0  | 0 | 0 | 0 | 0  | 1              | 0  | 3                |
| <i>Protopolybia pallidibalteatus</i> (Cameron) | 2   | 0  | 0                | 0  | 0 | 0  | 0  | 0 | 0 | 0 | 0  | 0              | 0  | 2                |
| <i>Protopolybia rugulosa</i> Ducke             | 1   | 0  | 0                | 0  | 0 | 0  | 0  | 0 | 0 | 0 | 0  | 0              | 0  | 1                |
| <i>Pseudopolybia compressa</i> (de Sauss.)     | 0   | 0  | 0                | 2  | 0 | 0  | 0  | 0 | 0 | 0 | 0  | 0              | 0  | 2                |
| <i>Pseudopolybia langi</i> Bequaert            | 0   | 0  | 0                | 0  | 0 | 1  | 0  | 0 | 0 | 0 | 0  | 0              | 0  | 1                |
| <i>Pseudop. vespiceps</i> (de Saussure)        | 0   | 0  | 0                | 0  | 1 | 0  | 0  | 1 | 0 | 0 | 0  | 2              | 0  | 4                |
| <i>Synoeca surinama</i> (Linnaeus)             | 0   | 0  | 0                | 0  | 0 | 0  | 0  | 1 | 0 | 0 | 0  | 0              | 1  | 2                |
| <b>Total</b>                                   | 115 | 30 | 33               | 14 | 9 | 26 | 17 | 2 | 6 | 8 | 11 | 105            | 48 | <b>424</b>       |
| <b>Number of species</b>                       | 12  | 6  | 7                | 10 | 6 | 13 | 6  | 2 | 4 | 5 | 9  | 36             | 6  | <b>61</b>        |
